# Supplementary material for: The Impact of the Extracellular Matrix Environment on Sost Expression by the MLO-Y4 Osteocyte Cell Line
Source: MDPI journal article supplement (doi:10.3390/bioengineering9010035), 2022-01-13
Supplement: s1 [file s1]

Supplementary

# The Impact of the Extracellular Matrix Environment on *Sost* Expression by the MLO-Y4 Osteocyte Cell Line

Robert T. Brady <sup>1,2,3,4</sup>, Fergal J. O'Brien <sup>1,2,3</sup>, David A. Hoey <sup>2,3,4,\*</sup>

<sup>1</sup> Tissue Engineering Research Group, Department of Anatomy & Regenerative Medicine, Royal College of Surgeons in Ireland, Dublin, D02 YN77, Ireland. robertthomasbrady@gmail.com (R.T.B.); fjobrien@rcsi.ie (F.J.O'B)

<sup>2</sup> Trinity Centre for Biomedical Engineering, School of Engineering, Trinity College Dublin, Dublin, D02 PN40, Ireland

<sup>3</sup> Advanced Materials and BioEngineering Research Centre (AMBER), Trinity College Dublin & Royal College of Surgeons in Ireland, Dublin, D02 PN40, Ireland

<sup>4</sup> Department of Mechanical, Manufacturing, and Biomedical Engineering, Trinity College Dublin, Dublin, D02 PN40, Ireland

\* Correspondence: dahoe@tcd.ie

**Table S1.** Table related to primer sequences and concentrations employed in quantitative PCR analysis.

| Gene symbol | T <sub>m</sub> (°C) | Primer concentration | Sequence                                                | Amplicon Size |
|-------------|---------------------|----------------------|---------------------------------------------------------|---------------|
| 18s         | 65                  | 400 nM               | 5'-GTAACCCGTTGAACCCCAT-3'<br>3'-CCATCCAATCGGTAGTAGCG-5' | 151bp         |
| <i>Sost</i> | 60                  | 400 nM               | 5'-CGTGCCTCATCTGCCTACTT-3'<br>3'-ATAGGGATGGTGGGGAGGT-5' | 185bp         |

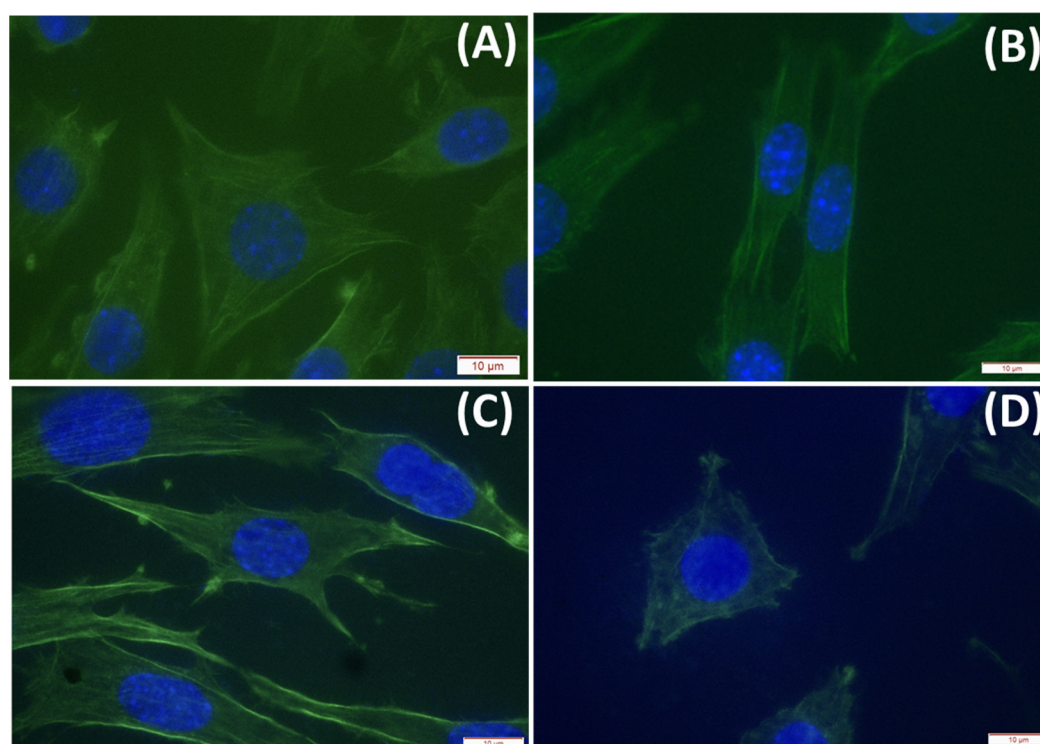

**Figure S1.** High magnification of MLO-Y4 cells cultured on different substrates of (A) Collagen-1 (Coll 2D), (B) Collagen-1 + Chondroitin Sulphate (Coll-GAG 2D), (C) Collagen-1 + Hydroxyapatite (Coll-HA 2D), (D) Collagen-1 + Chondroitin Sulphate + Hydroxyapatite (Coll-GAG-HA 2D). (scale = 10μm).

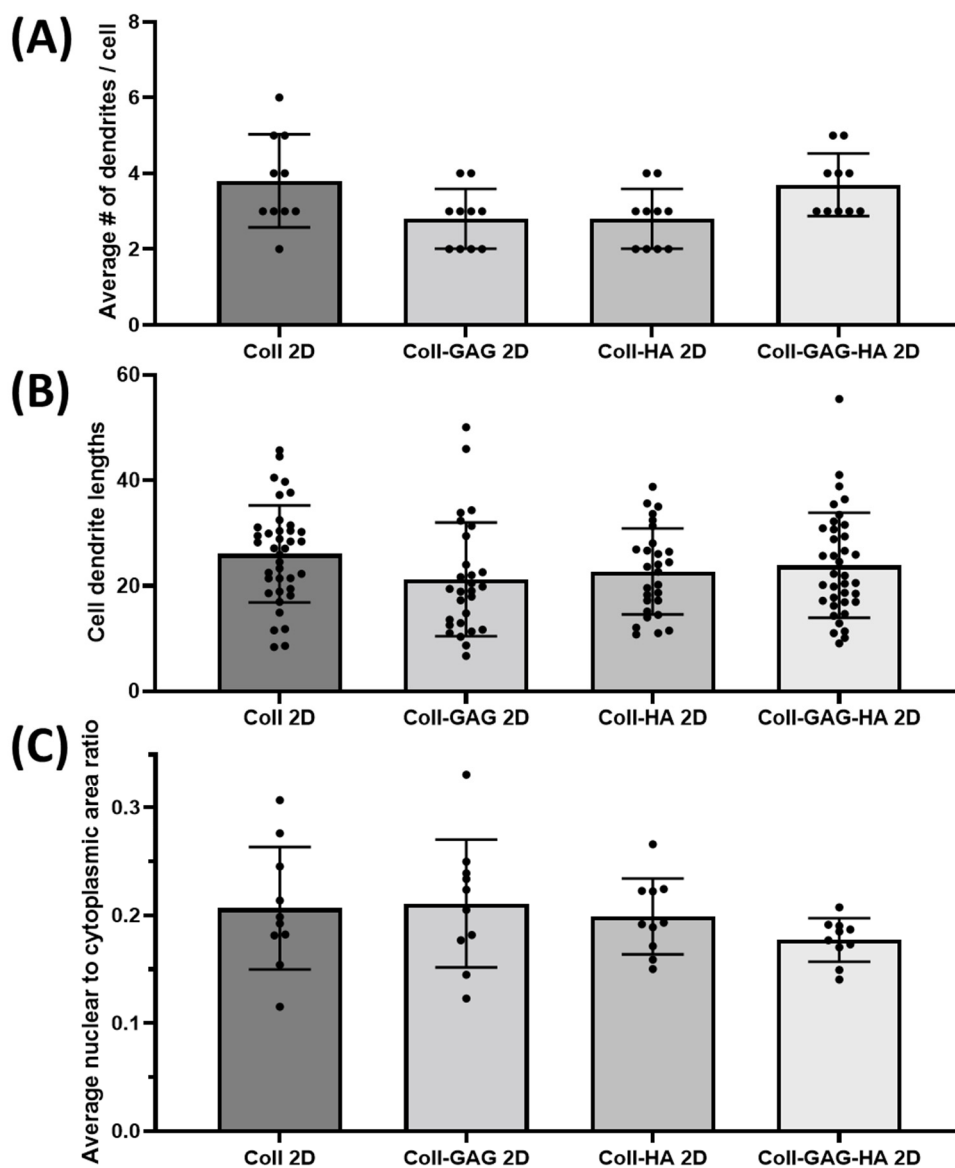

**Figure S2.** Morphological data from cells cultured on 2D substrates for 72 hours. **(A)** There were no significant differences in total number of dendrites per cells cultured upon different substrates. **(B)** There were no significant differences in the length of dendrites when cells were cultured upon different substrates. **(C)** There were also no significant differences in the nuclear to cytoplasmic to ratio of cells when cultured upon different substrates.
